# Supplementary material
Source: publisher figshare collection journal article supplement (https://sage.figshare.com/ndownloader/files/22256757)
Supplement: Supplementary file 1 [file 22256757]

Supplementary Table 1

*Model Fit Indices and Entropy for Personality Profiles for 2- to 7-Profile Solutions*

| Number of profiles | AIC | BIC | Adjusted  BIC | Entropy | LMR LRT  *p* value |
| --- | --- | --- | --- | --- | --- |
| 2 | 86,108.54 | 86,296.53 | 86,198.03 | .76 | .000 |
| 3 | 84,299.38 | 84,554.07 | 84,420.62 | .77 | .000 |
| 4 | 83,586.38 | 83,907.78 | 83,739.37 | .75 | .001 |
| 5 | 83,058.37 | 83,446.47 | 83,243.11 | .74 | .003 |
| **6** | **82,669.56** | **83,124.36** | **82,886.05** | **.77** | **.003** |
| 7 | 82,373.44 | 82,894.94 | 82,621.68 | .77 | .60 |

*Note*. Boldface type indicates the selected model. AIC = Akaike information criterion; BIC = Bayesian information criterion; LMR LRT = Lo-Mendell-Rubin adjusted likelihood ratio test.

Supplementary Table 2

*Raw Scores of Personality Traits by Dyadic Personality Profiles*

|  | **“Opposite” profiles** | | | | |  | **“Similar” profiles** | | | | |  | **“Extreme-spouse” profiles** | | | | |  | Post-hoc  group  differencea |
| --- | --- | --- | --- | --- | --- | --- | --- | --- | --- | --- | --- | --- | --- | --- | --- | --- | --- | --- | --- |
|  | Profile 1  (33%) | |  | Profile 2  (19%) | |  | Profile 3  (25%) | |  | Profile 4  (15%) | |  | Profile 5  (5%) | |  | Profile 6  (3%) | |  |
|  | *Positive wife*  *& negative husband* | |  | *Negative wife & positive husband* | |  | *Similarly*  *positive* | |  | *Similarly negative* | |  | *Extremely negative husband* | |  | *Extremely negative*  *wife* | |  |
| Variables | *M* | *SD* |  | *M* | *SD* |  | *M* | *SD* |  | *M* | *SD* |  | *M* | *SD* |  | *M* | *SD* |  |
| Neuroticism |  |  |  |  |  |  |  |  |  |  |  |  |  |  |  |  |  |  |  |
| Husband | 2.02 | 0.58 |  | 1.82 | 0.55 |  | 1.67 | 0.52 |  | 2.15 | 0.55 |  | 2.29 | 0.58 |  | 1.99 | 0.64 |  | 4,5>1,6>2>3 |
| Wife | 1.99 | 0.55 |  | 2.27 | 0.59 |  | 1.83 | 0.54 |  | 2.32 | 0.63 |  | 2.05 | 0.58 |  | 2.42 | 0.56 |  | 2,4,6>1,5>3 |
| Extraversion |  |  |  |  |  |  |  |  |  |  |  |  |  |  |  |  |  |  |  |
| Husband | 2.91 | 0.40 |  | 3.47 | 0.35 |  | 3.60 | 0.32 |  | 2.71 | 0.44 |  | 2.15 | 0.42 |  | 3.28 | 0.40 |  | 3>2>6>1>4>5 |
| Wife | 3.53 | 0.34 |  | 2.82 | 0.40 |  | 3.62 | 0.32 |  | 2.68 | 0.42 |  | 3.42 | 0.39 |  | 2.30 | 0.47 |  | 1,3>5>2>4>6 |
| Agreeableness |  |  |  |  |  |  |  |  |  |  |  |  |  |  |  |  |  |  |  |
| Husband | 3.20 | 0.39 |  | 3.68 | 0.30 |  | 3.77 | 0.27 |  | 3.00 | 0.40 |  | 2.42 | 0.40 |  | 3.47 | 0.37 |  | 2,3>6>1>4>5 |
| Wife | 3.82 | 0.24 |  | 3.49 | 0.35 |  | 3.89 | 0.20 |  | 3.22 | 0.40 |  | 3.74 | 0.30 |  | 2.47 | 0.36 |  | 1,3>5>2>4>6 |
| Conscientiousness |  |  |  |  |  |  |  |  |  |  |  |  |  |  |  |  |  |  |  |
| Husband | 3.16 | 0.37 |  | 3.31 | 0.36 |  | 3.46 | 0.30 |  | 2.99 | 0.36 |  | 2.70 | 0.42 |  | 3.20 | 0.34 |  | 3>2>1, 6>4>5 |
| Wife | 3.41 | 0.33 |  | 3.24 | 0.35 |  | 3.52 | 0.29 |  | 3.10 | 0.38 |  | 3.38 | 0.36 |  | 2.72 | 0.43 |  | 3>1,5>2>4>6 |
| Openness |  |  |  |  |  |  |  |  |  |  |  |  |  |  |  |  |  |  |  |
| Husband | 2.77 | 0.41 |  | 3.17 | 0.42 |  | 3.36 | 0.39 |  | 2.52 | 0.42 |  | 2.12 | 0.43 |  | 2.99 | 0.42 |  | 3>2>6>1>4>5 |
| Wife | 3.11 | 0.45 |  | 2.63 | 0.41 |  | 3.33 | 0.39 |  | 2.50 | 0.44 |  | 2.95 | 0.47 |  | 2.08 | 0.46 |  | 3>1>5>2,4>6 |

*Note.* Couple *N* = 3,178. Number of cases may vary across variables due to missing values. Personality items were rated 1 = *not at all*, 2 = *a little*, 3 = *some*, 4 = *a lot*.

aBased on one-way analysis of variance (ANOVA) with Tukey’s HSD post-hoc tests (*p* < .008); numbers indicate profiles.

Supplementary Table 3

*Multilevel Models Predicting Marital Quality by Dyadic Personality Profiles and Covariates*

|  | Spousal support | | | | | | |  | Spousal strain | | | | | | |
| --- | --- | --- | --- | --- | --- | --- | --- | --- | --- | --- | --- | --- | --- | --- | --- |
|  | Model 1 | | |  | Model 2 | | |  | Model 1 | | |  | Model 2 | | |
| Variables | *B* |  | *SE* |  | *B* |  | *SE* |  | *B* |  | *SE* |  | *B* |  | *SE* |
| **Fixed effects** |  |  |  |  |  |  |  |  |  |  |  |  |  |  |  |
| Intercept | 3.45 | ** | 0.13 |  | 3.44 | ** | 0.13 |  | 2.18 | ** | 0.13 |  | 2.19 | ** | 0.13 |
| ***Dyadic personality profiles*** |  |  |  |  |  |  |  |  |  |  |  |  |  |  |  |
| Profile 1: *Positive wife & negative husband* | -0.12 | ** | 0.02 |  | -0.14 | ** | 0.02 |  | 0.12 | ** | 0.02 |  | 0.12 | ** | 0.03 |
| Profile 2: *Negative wife & positive husband* | -0.15 | ** | 0.02 |  | -0.10 | ** | 0.02 |  | 0.14 | ** | 0.03 |  | 0.12 | ** | 0.03 |
| Profile 3: *Similarly positive* (reference) | — |  | — |  | — |  | — |  | — |  | — |  | — |  | — |
| Profile 4: *Similarly negative* | -0.32 | ** | 0.03 |  | -0.27 | ** | 0.03 |  | 0.27 | ** | 0.03 |  | 0.24 | ** | 0.04 |
| Profile 5: *Extremely negative husband* | -0.44 | ** | 0.05 |  | -0.42 | ** | 0.05 |  | 0.33 | ** | 0.05 |  | 0.30 | ** | 0.06 |
| Profile 6: *Extremely negative wife* | -0.40 | ** | 0.05 |  | -0.28 | ** | 0.07 |  | 0.29 | ** | 0.06 |  | 0.27 | ** | 0.08 |
| ***Interactions with gender*** |  |  |  |  |  |  |  |  |  |  |  |  |  |  |  |
| Female × Profile 1 |  |  |  |  | 0.03 |  | 0.03 |  |  |  |  |  | -0.01 |  | 0.03 |
| Female × Profile 2 |  |  |  |  | -0.11 | * | 0.03 |  |  |  |  |  | 0.05 |  | 0.04 |
| Female × Profile 3 (reference) |  |  |  |  | — |  | — |  |  |  |  |  | — |  | — |
| Female × Profile 4 |  |  |  |  | -0.11 | * | 0.04 |  |  |  |  |  | 0.05 |  | 0.04 |
| Female × Profile 5 |  |  |  |  | -0.05 |  | 0.07 |  |  |  |  |  | 0.06 |  | 0.07 |
| Female × Profile 6 |  |  |  |  | -0.24 |  | 0.11 |  |  |  |  |  | 0.04 |  | 0.10 |
| ***Individual covariates*** |  |  |  |  |  |  |  |  |  |  |  |  |  |  |  |
| Female | -0.20 | ** | 0.01 |  | -0.17 | ** | 0.02 |  | 0.10 | *** | 0.01 |  | 0.09 | * | 0.03 |
| Years of education | 0.00 |  | 0.00 |  | 0.00 |  | 0.00 |  | 0.00 |  | 0.00 |  | 0.00 |  | 0.00 |
| Working for pay | -0.04 |  | 0.02 |  | -0.04 |  | 0.02 |  | 0.06 | * | 0.02 |  | 0.06 | * | 0.02 |
| Racea |  |  |  |  |  |  |  |  |  |  |  |  |  |  |  |
| Hispanic | 0.02 |  | 0.03 |  | 0.02 |  | 0.03 |  | 0.05 |  | 0.04 |  | 0.05 |  | 0.04 |
| African American | -0.09 | * | 0.03 |  | -0.09 | * | 0.03 |  | 0.11 | * | 0.04 |  | 0.11 | * | 0.04 |
| Other races | -0.01 |  | 0.05 |  | -0.01 |  | 0.05 |  | 0.11 |  | 0.06 |  | 0.11 |  | 0.06 |
| First marriage | 0.02 |  | 0.02 |  | 0.02 |  | 0.02 |  | 0.03 |  | 0.02 |  | 0.02 |  | 0.02 |
| Self-rated healthb | 0.03 | ** | 0.01 |  | 0.03 | * | 0.01 |  | -0.04 | ** | 0.01 |  | -0.04 | ** | 0.01 |
| Number of chronic conditions | 0.00 |  | 0.01 |  | 0.00 |  | 0.01 |  | 0.01 |  | 0.01 |  | 0.01 |  | 0.01 |
| ***Couple covariates*** |  |  |  |  |  |  |  |  |  |  |  |  |  |  |  |
| Household incomec | 0.02 |  | 0.01 |  | 0.02 |  | 0.01 |  | -0.03 | * | 0.01 |  | -0.03 | * | 0.01 |
| Years of marriage | 0.00 |  | 0.00 |  | 0.00 |  | 0.00 |  | 0.00 |  | 0.00 |  | 0.00 |  | 0.00 |
| Number of children | 0.00 |  | 0.01 |  | 0.00 |  | 0.01 |  | 0.00 |  | 0.01 |  | 0.00 |  | 0.01 |
| Coresiding with minor children | -0.08 |  | 0.05 |  | -0.08 |  | 0.05 |  | 0.05 |  | 0.05 |  | 0.05 |  | 0.05 |
| Wave 2010 | 0.00 |  | 0.02 |  | 0.00 |  | 0.02 |  | -0.02 |  | 0.02 |  | -0.02 |  | 0.02 |
| **Random effects** |  |  |  |  |  |  |  |  |  |  |  |  |  |  |  |
| Intercept variance | 0.09 | ** | 0.01 |  | 0.09 | ** | 0.01 |  | 0.13 | ** | 0.01 |  | 0.13 | ** | 0.01 |
| Residual variance | 0.22 | ** | 0.01 |  | 0.22 | ** | 0.01 |  | 0.28 | ** | 0.01 |  | 0.28 | ** | 0.01 |

*Note.* Couple *N* = 3,178.

aWhite = reference category. b﻿1= *poor*, 2 = *fair*, 3 = *good*, 4 = *very good*, 5 = *excellent*. cLog-transformed.

**p* < .008. ***p* < .001.
